# Supplementary material for: Unifying theories on the Southern Ocean bio-optical anomaly
Source: Research Square preprint supplement (doi:10.21203/rs.3.rs-7906673/v1), 2025-10-28
Supplement: Supplementary file 1 [file ae526a596267e322ec0e452b.pdf]

# Supplementary

## Unifying theories on the Southern Ocean bio-optical anomaly

Xuerong Sun<sup>\*1</sup>, Robert J. W. Brewin<sup>1</sup>, Giorgio Dall’Olmo<sup>2</sup>, Jaime Pitarch<sup>3</sup>,  
Thomas G. Bell<sup>4</sup>, Bethany Wilkinson<sup>4</sup>, Dionysios E. Raitsos<sup>5</sup>, Hendrik Jan van  
der Woerd<sup>6</sup>, and Shubha Sathyendranath<sup>4,7</sup>

<sup>1</sup>Centre for Geography and Environmental Science, Department of Earth and  
Environmental Sciences, Faculty of Environment, Science and Economy,  
University of Exeter, Cornwall, United Kingdom

<sup>2</sup>Istituto Nazionale di Oceanografia e di Geofisica Sperimentale - OGS, Trieste,  
Italy

<sup>3</sup>National Research Council (CNR), Institute of Marine Sciences (ISMAR),  
Rome, Italy

<sup>4</sup>Plymouth Marine Laboratory, Plymouth, Devon, United Kingdom

<sup>5</sup>Department of Biology, National and Kapodistrian University of Athens,  
Athens, Greece

<sup>6</sup>Department of Water & Climate Risk, Institute for Environmental Studies  
(IVM), VU University Amsterdam, Amsterdam, the Netherlands

<sup>7</sup>National Centre for Earth Observation, Plymouth Marine Laboratory,  
Plymouth, Devon, United Kingdom

---

<sup>\*</sup>Corresponding author: x.sun8@exeter.ac.uk

## 21 S1 Figures

### 22 S1.1 Figure S1

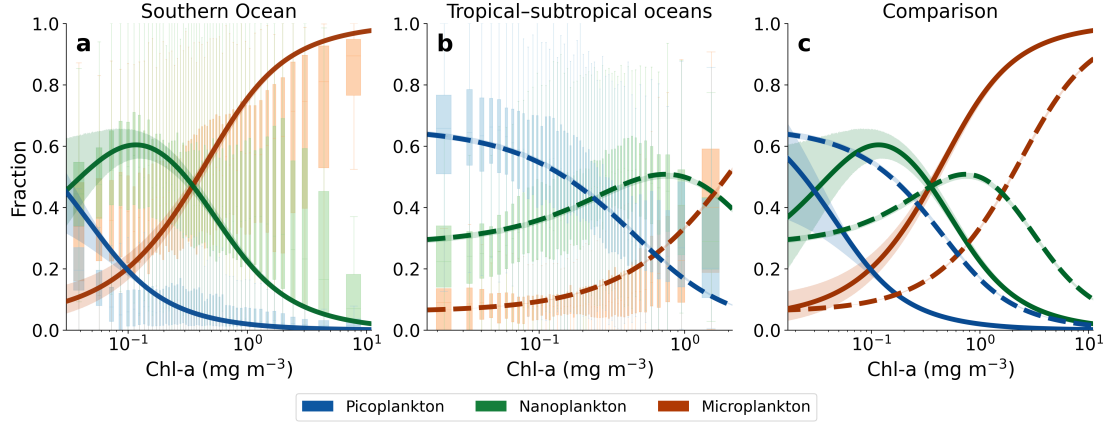

Figure S1. Same as Figure 2 in the main text. Given the large number of observations (16,977 Southern Ocean; 23,065 tropical-subtropical), individual dots overlap. Unlike Figure 2, which shows observation densities, here the in-situ measurements are summarised as box plots of the observed fractions ( $F_1$ ,  $F_2$ ,  $F_3$ ) after  $\log_{10}$ -scale binning of Chl-a. Each box plot shows the median and interquartile range, with whiskers extending to  $1.5 \times \text{IQR}$ . Bin widths vary on the raw Chl-a scale but have approximately equal sample counts.

## S1.2 Figure S2

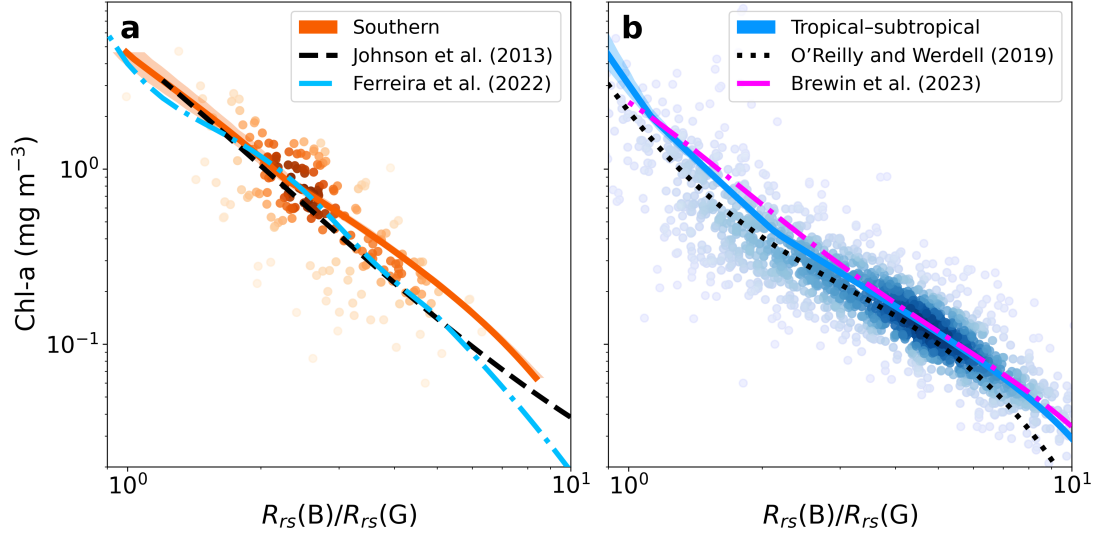

Figure S2. Ocean colour characteristics as a function of Chl-a across two ocean regions. a, Observations (dots) and model estimates (lines) of the relationship between the maximum blue-green band ratio ( $R_{rs}(B)/R_{rs}(G)$ ) and Chl-a for the Southern Ocean, with relationships reported in previous studies (Johnson et al., 2013; Ferreira et al., 2022). b, Observations (dots) and model estimates (lines) of the relationship for the tropical-subtropical oceans, with previous results shown for comparison (O'Reilly and Werdell, 2019; Brewin et al., 2023).

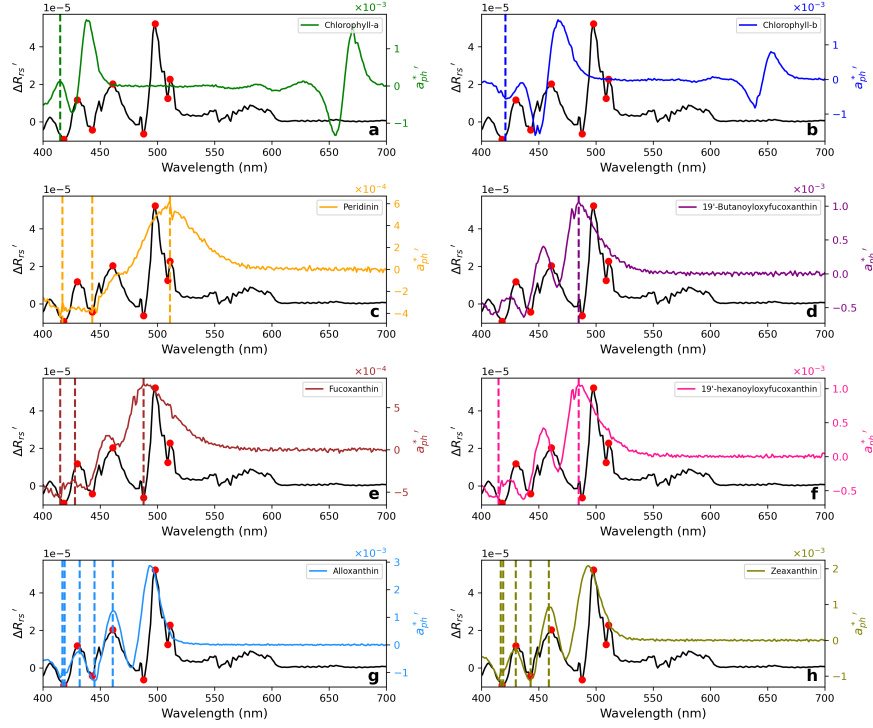

Figure S3. Comparison between the first derivative of hyperspectral remote sensing reflectance ( $\Delta R_{rs}'$ , black line, left y-axis) between the Southern Ocean and tropical-subtropical waters, and the first derivative of chlorophyll-specific absorption spectra ( $a_{ph}^*$ , coloured line, right y-axis) for eight pigments (Clementson and Wojtasiewicz, 2019). Red circles indicate the prominent positions of peaks in  $\Delta R_{rs}'$  (local maxima and minima), with vertical dashed lines representing pigment derivative peaks that fall within  $\pm 3$  nm of these  $R_{rs}$  derivative features. Note that the spectra from Clementson and Wojtasiewicz (2019) were measured in solvent and differ from in-vivo absorption. They are used here as a reference for peak identification, while more direct comparisons would require in-vivo data.

A dataset of 10,000 simulated OCMF (Ocean Colour Modelling Framework) hyperspectral  $R_{rs}$  spectra was generated separately for the Southern Ocean and the tropical-subtropical regions. Chl-a were randomly sampled from a log-normal distribution (0.01 to 100 mg m<sup>-3</sup>), with weighted sampling based on in-situ probability distributions to reflect regional variability. The difference in  $R_{rs}$ ,  $\Delta R_{rs}$ , was calculated as the median  $R_{rs}$  of the Southern Ocean minus that of the tropical-subtropical ocean. Its first derivative,  $\Delta R_{rs}'$ , was then computed, and peaks (local maxima and minima) were identified ('scipy.signal.find\_peaks' in Python). To ensure robustness, bootstrap resampling ( $N = 1,000$ ) was performed, and redundant peaks within  $\pm 1$  nm of a more frequent peak were removed. Chlorophyll-specific absorption spectra ( $a_{ph}^*$ , m<sup>2</sup> (mg C)<sup>-1</sup>) for eight phytoplankton pigments (Clementson and Wojtasiewicz, 2019) were interpolated to 1-nm resolution, and their first derivatives were compared to  $\Delta R_{rs}'$ .

The  $\Delta R_{rs}$  spectrum exhibits eight prominent peaks at 418, 430, 443, 461, 488, 498, 509, and 511 nm. While some (e.g., 443 and 488 nm) align with bands of multispectral sensors, others (e.g., 418, 430, 461, 509, 511 nm) are unique to hyperspectral platforms, such as PACE, GLIMER, and HICO. By comparing the locations of  $\Delta R_{rs}'$  peaks with those of  $a_{ph}^*$ , we found that several features of  $R_{rs}$  differences are associated with specific pigments. For example, the 418 nm peak corresponds to multiple pigments, including alloxanthin, fucoxanthin, zeaxanthin, 19'-hexanoyloxyfucoxanthin, chlorophyll-a, and chlorophyll-b. Other peaks show more distinct associations. The 461 nm peak with alloxanthin and zeaxanthin, 489 nm with fucoxanthin, and 511 nm with peridinin, each serving as a diagnostic marker for certain phytoplankton groups.



## S1.4 Figure S4

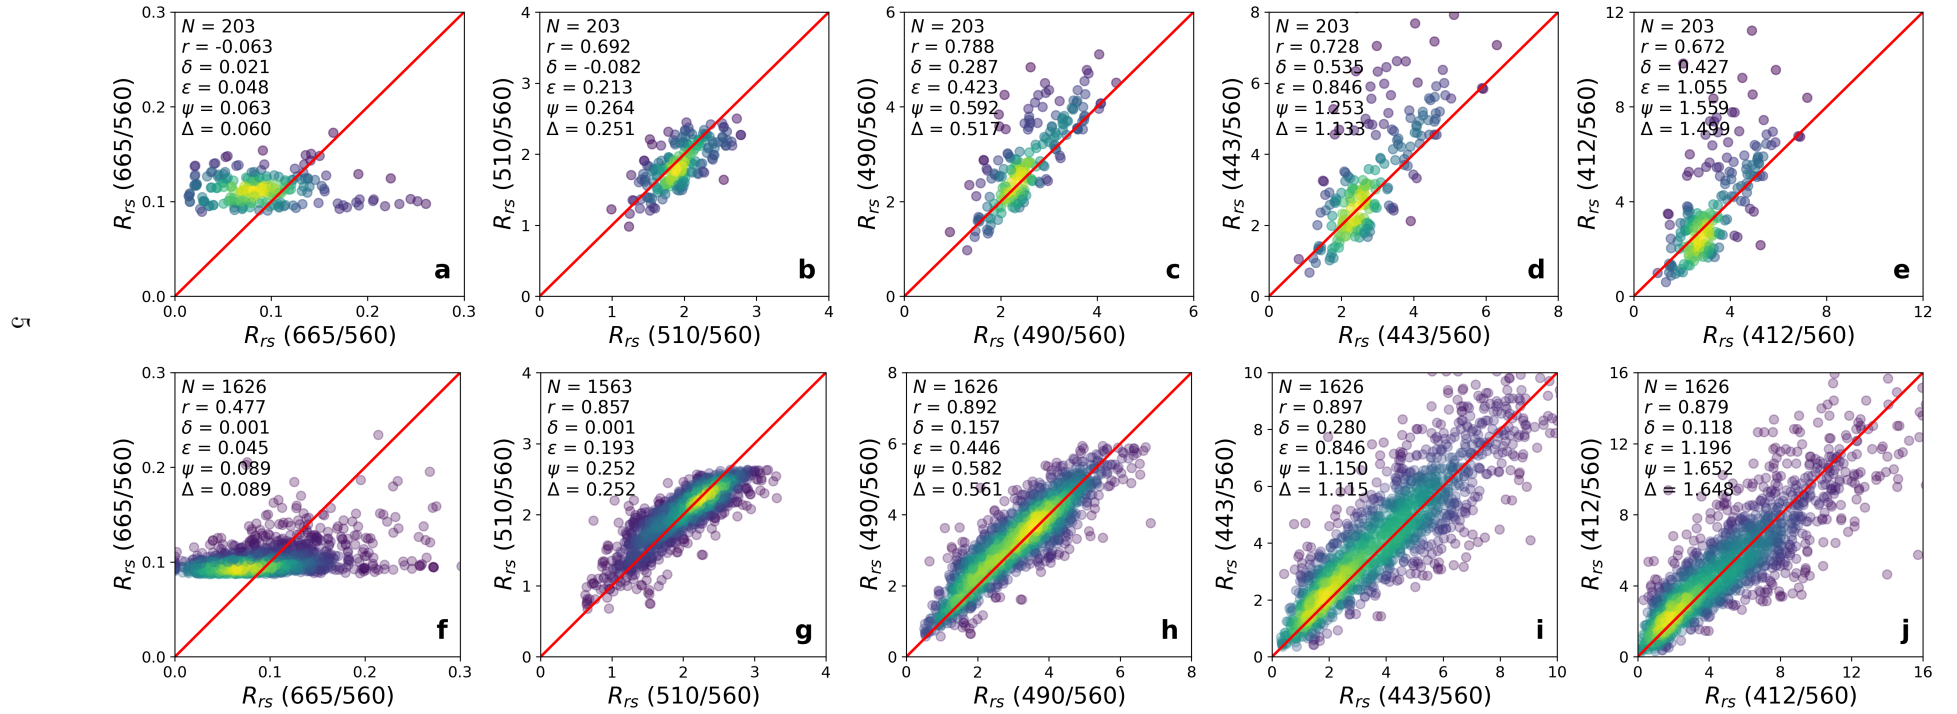

Figure S4. Independent validation of  $R_{rs}$  band ratios (normalised at 560 nm), comparing in-situ measurements (x-axis) with OCMF estimates (y-axis). a-e, Southern Ocean at 665, 510, 490, 443, and 412 nm; f-j, tropical-subtropical oceans at corresponding wavelengths. The red line indicates the 1:1 reference.

## S2 In-situ Data

### S2.1 HPLC pigments

This study compiled a dataset of 62,337 High Performance Liquid Chromatography (HPLC) samples collected from the global ocean. These include publicly available data from various sources, such as Australian Ocean Data Network (AODN, [IMOS, 2021a,b](#)), Biological and Chemical Oceanography Data Management Office (BCO-DMO, [McGillicuddy, 2007b,a](#); [DiTullio, 2011](#); [Vaillancourt and Marra, 2011](#); [Bidigare, 2012](#); [Richardson et al., 2013](#); [DiTullio, 2015](#); [Lee, 2020](#); [Lohrenz et al., 2020](#); [Landry, 2021](#)), DataONE ([Palmer Station Antarctica LTER et al., 2020](#); [Southern California Bight MBON et al., 2021](#)), Environmental Data Initiative Data Portal (EDI, [Palmer Station Antarctica LERT et al., 2018](#)), NASA SeaWiFS Bio-optical Archive and Storage System (SeaBASS, [Werdell et al., 2003](#)), PANGAEA ([Taylor et al., 2011b](#); [Claustre, 2013](#); [Bracher, 2014](#); [Clayton et al., 2014](#); [Peeken and Hoffmann, 2014](#); [Peeken and Nachtigall, 2014](#); [Bracher, 2015a](#); [Bracher et al., 2015](#); [Bracher, 2015b,c,d,e](#); [Hepach et al., 2016](#); [Peeken et al., 2017c,a,b](#); [Peeken and Quack, 2017](#); [Peeken and Walter, 2017](#); [Peeken et al., 2017d](#); [Taylor and Bracher, 2017](#); [Bracher, 2019](#); [Bracher et al., 2020](#); [Xi et al., 2023](#)), and some published works ([Brewin et al., 2015](#); [Jordan et al., 2024](#); [Hayward et al., 2024](#)).

To ensure data quality for subsequent analysis, several quality control steps were applied to the original HPLC dataset. When multiple samples were available at a station, each was treated as an individual observation. Each HPLC sample provides concentrations of total Chl-a (the sum of monovinyl chlorophyll-a, divinyl chlorophyll-a, and chlorophyllide-a) and seven diagnostic pigments used to infer phytoplankton size classes ([Vidussi et al., 2001](#); [Uitz et al., 2006](#)). Samples with Chl-a below  $0.001 \text{ mg m}^{-3}$  were removed, and any diagnostic pigment values below this threshold were set to zero ([Claustre et al., 2004](#)). Additionally, samples were retained only if the difference between total chlorophyll concentration and total accessory pigments concentration did not exceed 30% of the total pigment concentration ([Aiken et al., 2009](#)). To maintain the independence of comparisons between Chl-a and blue-green  $R_{rs}$  band ratios, any HPLC samples with concurrent  $R_{rs}$  measurements were excluded. Since the Ocean Colour Modelling Framework (OCMF, see Section 4.4 in the main text for details) is designed for Case-1 waters, samples potentially from optically complex waters were removed using water type classifications derived from OC-CCI satellite data (see Section S3.2 for details). Samples were restricted to two regions of interest: the Southern Ocean (latitudes south of  $60^\circ\text{S}$ ) and the combined tropical-subtropical oceans (between  $40^\circ\text{N}$  and  $40^\circ\text{S}$ ). After applying all quality control and selection criteria, a total of 37,763 HPLC samples ( $N = 16,578$  and  $21,185$  for the Southern Ocean and the tropical-

subtropical oceans, respectively) were retained for further analysis (Figure S5).

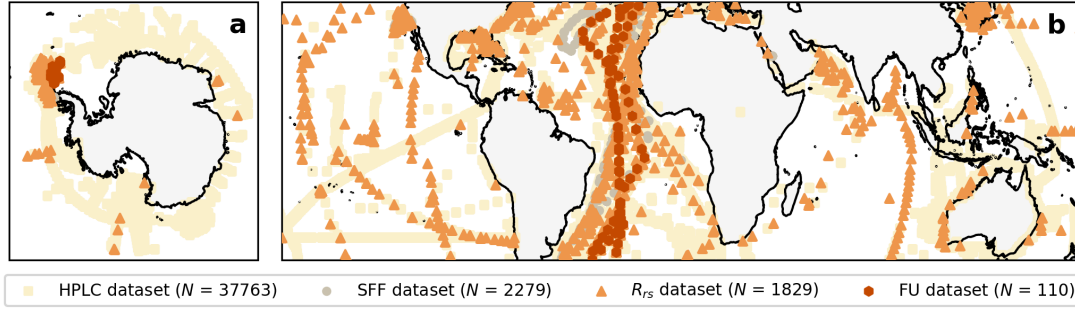

Figure S5. Geographic distribution of in-situ datasets used in this study for the Southern Ocean (south of 60°S, a) and tropical-subtropical regions (between 40°N and 40°S, b). Data include HPLC pigments (squares,  $N = 37,763$ ), size-fractionated filtration (circles,  $N = 2,279$ ), remote sensing reflectance (triangles,  $N = 1,829$ ), and Forel-Ule colour observations (hexagons,  $N = 110$ ).

## S2.2 Size-fractionated filtration Chl-a

A total of 3,610 size-fractionated fluorometric (SFF) Chl-a measurements collected from the global ocean were used in this study. These include publicly available data from various sources, such as, British Oceanographic Data Centre (BODC, [British Oceanographic Data Centre \(BODC\), 2020](#)), DataONE ([California Current Ecosystem LTER and Goericke, 2018](#); [Sosik et al., 2021](#)), and some published works ([Brewin et al., 2014a, 2017, 2019](#); [Venables et al., 2023](#)).

In general, the Chl-a concentration in water passing through a 2  $\mu\text{m}$  filter is designated  $C_1$  (picoplankton), the concentration retained between the 2 and 20  $\mu\text{m}$  filters as  $C_2$  (nanoplankton), and the concentration retained on the 20  $\mu\text{m}$  filter as  $C_3$  (microplankton). The total Chl-a is calculated as the sum of these three size fractions. Following a quality control procedure similar to that applied to the HPLC dataset, samples with concurrent  $R_{rs}$  measurements or those potentially from optically complex coastal waters were excluded, resulting in 2,279 SFF samples remained for analysis, including 399 from the Southern Ocean and 1,880 from tropical-subtropical regions (Figure S5).

## S2.3 Particulate absorption coefficients and Chl-a

From January to March 2024, we conducted a PICCOLO expedition (Processes Influencing Carbon Cycling: Observations of the Lower Limb of the Antarctic Overturning) in the Weddell Sea, Antarctica, one of the least-sampled regions of the Southern Ocean. One of the objectives of the cruise was to investigate the observed bio-optical anomaly.

During the cruise, particulate absorption coefficients ( $a_p(\lambda)$ ), ranging from 400 to 750 nm, were measured quasi-continuously using an AC-S spectrophotometer (WET Labs, serial number 297). The AC-S was integrated into the underway optics system, following design and methods described in [Dall’Olmo et al. \(2009\)](#), which draws seawater from 7 m depth. The system collects concurrent measurements of total absorption and attenuation coefficients of the bulk water,  $a(\lambda)$  and  $c(\lambda)$ , respectively. To distinguish particulate components, every hour the flow was automatically diverted for 10 minutes through a 0.2- $\mu\text{m}$  filter (SUEZ Memtrex NY MNY921EGS), allowing computation of  $a_p(\lambda)$  and particulate attenuation ( $c_p(\lambda)$ ) by subtracting the filtered signal from the bulk. Data acquisition was initially managed by the WET Labs DH4 system and later transitioned to the open-source INLININO software (<https://github.com/OceanOptics/Inlinino>).

Post-processing included 1-minute binning, quality screening, and corrections for temperature and scattering effects. During binning, data affected by bubbles or flow blockages (e.g., from sea ice) were removed. Flow rate data from the inline flow sensor were used to exclude non-flow periods, and ship metadata (e.g., hoist position, speed) were used to flag unreliable data. Only data collected within the start and end times of sampling stations were retained.

Subsequently, a series of quality control steps were conducted on both the bulk and filtered datasets. Spectra with high relative variability were excluded, defined as a standard deviation to median ratio above certain percentile (e.g., 90th at most stations). Given the temperature differences between the Antarctic cold seawater and the warm laboratory environment where the AC-S operated, measurements collected after thermal stabilisation were used, which was assessed using the temperature recorded by the AC-S.

Spectrally anomalous data, defined as any 1-minute spectrum with more than half its values falling outside  $\pm 1$  IQR (bounded by the 16th and 84th percentiles) from the station median, were removed. This procedure was applied separately to bulk and filtered datasets. To correct for transient effects during the automatic filter switch from bulk to filtered seawater, filtered time-series of each hour were fitted to an exponential model, and the intercept derived was used as the corrected value for the 0.2  $\mu\text{m}$ -filtered values for that hour. For stations with multiple filtered periods, these were interpolated before subtraction from bulk signals to derive  $a_p(\lambda)$  and  $c_p(\lambda)$ . Spectra were then smoothed using a Savitzky-Golay filter (`‘savgol_filter’` in Python). A correction for temperature and scattering ( $b_p(\lambda) = c_p(\lambda) - a_p(\lambda)$ ) effects was then applied following the method described by [Slade et al. \(2010\)](#), which adjusts for temperature-induced biases in absorption based on near-infrared optical properties. Only spectra with non-negative values across 400–700 nm were retained. The final  $a_p(\lambda)$  and  $c_p(\lambda)$  for each station were calculated as

113 the median of all valid 1-minute spectra.

114 In total, 37 stations of underway optical observations, specifically,  $a_p(\lambda)$ , were collected during  
115 the PICCOLO cruise, which can be used to estimate Chl-a using the line-height method (Boss  
116 et al., 2007; Brewin et al., 2012), such that,

$$\text{Chl-a} = \frac{a_p(676) - (0.6 \cdot a_p(650) + 0.4 \cdot a_p(714))}{0.014}, \quad (1)$$

117 where 0.014 represents the chlorophyll-specific absorption coefficient for phytoplankton at 676  
118 nm, which can vary with pigment composition and phytoplankton size (Bricaud et al., 1995).

119 Besides, surface water samples were collected at each station for laboratory analysis of Chl-a  
120 using an in-vitro fluorometric method (Turner Trilogy fluorometer). Specifically, 100 mL of  
121 seawater was filtered, and the filters were extracted in 10 mL of acetone and stored at -20°C  
122 for up to 24 hours. After dark equilibration at room temperature, Chl-a concentrations were  
123 determined fluorometrically, with the fluorometer calibrated against known standards.

124 Of the 37 stations, 32 had concurrent fluorometric and  $a_p$ -derived Chl-a data. The two estimates  
125 showed strong agreement, with a correlation of 0.970, a bias of -0.052 (indicating slight underes-  
126 timation by the  $a_p$  method), and a root mean square difference (RMSD) of 0.110, all calculated  
127 in  $\log_{10}$  space. To improve accuracy, the chlorophyll-specific absorption coefficient in Equation  
128 1 was optimised using these 32 match-ups. The revised coefficient is 0.0124, which reduced the  
129 bias to 0.001 and RMSD to 0.097. This regionally tuned line-height method was then applied  
130 to  $a_p$  from all 37 stations to derive Chl-a estimates for further analysis.

## 131 S2.4 Remote sensing reflectance

132 This study compiled a large dataset of remote sensing reflectance ( $R_{rs}(\lambda)$ ) with concurrent Chl-a  
133 measurements (Figure S5), combining data from a previously compilation (Sun et al., 2025) with  
134 newly collected observations.

135 The newly added observations include high-resolution  $R_{rs}$  measurements collected during the  
136 PICCOLO cruise, where a Satlantic HyperSAS system was deployed for quasi-continuous sam-  
137 pling along the cruise track. The system consists of three sensors: a zenith-facing irradiance  
138 sensor ( $E_s$ ), and two radiance sensors facing the sky ( $L_i$ ) and sea surface ( $L_t$ ), respectively. The  
139 processing of the  $E_s$ ,  $L_i$ , and  $L_t$  and the calculation of  $R_{rs}(\lambda)$  followed procedures similar to  
140 those used in previous Atlantic Meridional Transect cruises (Brewin et al., 2016; Lin et al., 2022;

141 [Pardo et al., 2023](#)). Specifically, raw data were extracted using Satlantic SatView and SatCon  
 142 software, and were dark-corrected. The three radiometric data were then synchronised to the  
 143 nearest second, and only records with fully matched timestamps across all three sensors were  
 144 retained.

145 A series of quality control filters were applied for  $R_{rs}$  measurements in the PICCOLO cruise:  
 146 (1) due to the low sun elevation in the Weddell Sea during summer, solar zenith angle  $\leq 80^\circ$   
 147 to ensure adequate sun elevation; (2) an azimuth angle between  $70^\circ$  and  $170^\circ$  to reduce sun  
 148 glint; (3) platform pitch and roll both within  $\pm 5^\circ$  to minimise platform tilt effects; and (4) no  
 149 negative radiance or irradiance values at 444 nm. To further minimise sun glint contamination,  
 150 we applied a near-infrared (NIR) screening procedure based on the  $L_t$  reflectance spectrum.  
 151 Only records within the lowest 10th percentile of the NIR signal were retained.  $R_{rs}$  were then  
 152 calculated as,  $R_{rs}(\lambda) = (L_t(\lambda) - 0.028 \cdot L_i(\lambda))/E_s(\lambda)$ , where 0.028 is a standard correction  
 153 factor for skylight reflection under open-ocean conditions ([Mobley, 1999](#)). To further correct  
 154 for residual contamination, the average  $R_{rs}$  in the NIR band (750–800 nm) was subtracted  
 155 from each spectrum. Any spectra with negative values in the visible range (400–700 nm) were  
 156 discarded. Next, two spectral band ratios,  $R_{rs}(443)/R_{rs}(547)$  and  $R_{rs}(488)/R_{rs}(547)$ , were  
 157 calculated. For each ratio, the coefficient of variation (CV) was calculated, and any records with  
 158 CV over 0.15 in either ratio were excluded. The median  $R_{rs}$  spectrum was then calculated for  
 159 each remaining minute and used as the final quality-controlled dataset. Finally, the  $R_{rs}$  spectra  
 160 were matched with underway  $a_p$  data. Only  $R_{rs}$  measurements within a  $\pm 1$  hour window centred  
 161 on the timestamp of each valid  $a_p$  measurement were retained. Note that during the collection  
 162 of radiometry data on the PICCOLO cruise, the  $E_s$  sensor mounted on top of the central mast  
 163 became contaminated by ship exhaust. To correct for this, pre- and post-cleaning data collected  
 164 at the end of the cruise were used to model the relationship between  $E_s$ -derived PAR and PAR  
 165 from a foremast sensor, which was less affected by exhaust. A time-dependent polynomial model  
 166 was applied to correct the full  $E_s$  dataset. This correction had minimal impact on the spectral  
 167 shape in the blue-green region relevant to this study.

168 Additional  $R_{rs}(\lambda)$  from previous compilation include publicly available data from various sources,  
 169 such as, BODC ([Brewin et al., 2023](#)), NASA NOMAD (NASA bio-Optical Marine Algorithm  
 170 Dataset, version 2.a, [Werdell and Bailey, 2005](#)), NASA SeaWiFS Bio-optical Archive and Stor-  
 171 age System (SeaBASS, [Werdell et al., 2003](#)), PANGAEA ([Taylor et al., 2011a](#); [Bracher, 2014](#),  
 172 [2015d, 2017a,b](#); [Kramer et al., 2021](#); [Xi et al., 2021](#); [Bracher and Cheah, 2022](#); [Valente et al.,](#)  
 173 [2022](#)), and some published works ([Brewin et al., 2023](#); [Jordan et al., 2024](#)). These measure-  
 174 ments were generally obtained from radiometric observations, using instruments such as Sat-

lantic HyperSAS/Free-Falling Optical Profile, RAMSES TriOS, following the ocean optics protocols (Mueller et al., 2003) and factory user guidelines.

To ensure consistent data quality, all  $R_{rs}$  measurements with unrealistically high values (i.e.,  $>0.15 \text{ sr}^{-1}$ ) being discarded. The dataset included both multispectral and hyperspectral observations. Any samples with fewer than six valid spectral bands were excluded. Hyperspectral data with spectral resolution of 2 nm or finer were interpolated to 1 nm. Quality assurance (QA) scores were computed following the method of Wei et al. (2016), with wavelength bands selected on a per-sample basis, and only those samples with QA scores over 0.80 were retained. Since the OCMF model does not simulate Raman scattering, corrections for Raman effects were applied to  $R_{rs}$  prior to analysis, using the approach from Lee et al. (2013). Due to the lack of detailed information about sensor mounting angles and observational geometry, bidirectional reflectance distribution function corrections were not applied.

After applying all filtering and quality control procedures, a total of 1,829  $R_{rs}$  samples from Case-1 waters (based on water type information from OC-CCI, see Section S3.2) were retained for analysis, including 203 from the Southern Ocean and 1,626 from the tropical-subtropical regions.

## S3 Auxiliary datasets

### S3.1 Sea surface temperature

Sea surface temperature (SST) was obtained for each Chl-a sample to support forward modelling in the Ocean Colour Modelling Framework (OCMF), specifically for estimating temperature-dependent variables (i.e., backscattering coefficients of pure water) in two regions. SST values were sourced from the NOAA Optimum Interpolation Sea Surface Temperature (OISST) dataset, version 2, which provides global daily coverage at a  $1/4^\circ$  spatial resolution. This OISST dataset integrates observations from satellites, ships, buoys, and Argo floats, and is distributed by NOAA's Physical Sciences Laboratory (<https://psl.noaa.gov/data/gridded/data.noaa.oisst.v2.highres.html>). Each in-situ Chl-a sample was matched to the nearest OISST in space (latitude and longitude) and time (daily), and only samples with SST values between  $-1.8$  and  $40^\circ\text{C}$  were retained. Due to the limited availability of concurrent in-situ temperature data (e.g., from CTD casts), OISST match-ups were used instead. Previous study has shown high consistency between OISST and in-situ temperature measurements (see Supplementary Figure



205 S4 in Sun et al. (2023)).

## 206 S3.2 Water type classification

207 This study used monthly Ocean Colour Climate Change Initiative (OC-CCI) dataset, version 6.0,  
208 at 4 km spatial resolution (Sathyendranath et al., 2021), available at [https://climate.esa.in](https://climate.esa.int/en/projects/ocean-colour/)  
209 [t/en/projects/ocean-colour/](https://climate.esa.int/en/projects/ocean-colour/). The dataset includes optical water class information (Jackson  
210 et al., 2017), where 14 optical water classes are assigned to each pixel that span a gradient from  
211 clear open-ocean waters (class 1) to highly turbid coastal regions (class 14). These classifications  
212 were used to identify samples influenced by optically complex coastal waters (Sun et al., 2025).  
213 To determine the dominant water type at each sample location, 25 years of monthly OC-CCI  
214 data (1998–2022) were used. For each pixel, the mean values across all 14 classes were computed,  
215 and the class with the highest mean value was selected as the representative water type. Samples  
216 falling into classes 12, 13, or 14 were excluded from further analysis, which are likely associated  
217 with turbid coastal waters (Jackson et al., 2017).

## 218 S4 Methods

### 219 S4.1 Diagnostic pigment analyses

220 Phytoplankton size classes (PSCs) were estimated from the HPLC pigment data using diagnostic  
221 pigment analysis (Brewin et al., 2010; Hirata et al., 2011), which infers the fractional contribution  
222 of three size classes (pico-, nano-, and microplankton) based on the concentrations of seven  
223 diagnostic pigments. PSC fractions were calculated by applying weighting coefficients to each  
224 pigment and summing their contributions within each size class.

225 Previous studies have shown that these weights vary by region (Brewin et al., 2017). Therefore,  
226 in this study, region-specific weights were derived for the Southern Ocean and the tropical–  
227 subtropical oceans using in-situ datasets. The weights were determined by minimizing the dif-  
228 ference between the in-situ measured Chl-a concentration ( $C$ ) and the weighted sum of the  
229 seven diagnostic pigments ( $C_w$ ), expressed as  $C_w = \sum_{i=1}^7 W_i P_i$ , where  $P_i$  represents the  
230 concentration of each diagnostic pigment and  $W_i$  is its corresponding weight, with  $i$  = fucox-  
231 anthin, peridinin, 19'-hexanoyloxyfucoxanthin, 19'-butanoyloxyfucoxanthin, alloxanthin, total  
232 chlorophyll-b, and zeaxanthin. The regional weights were computed using multi-linear regres-  
233 sion on their corresponding datasets in  $\log_{10}$  space, as shown in Table S1. Using these newly



234 derived weights, the  $C_w$  showed strong agreement with the  $C$ , with correlation coefficients and  
 235 root mean square differences ( $\log_{10}$  space; see Methods in the main text) of 0.980 and 0.107 for  
 236 the Southern Ocean, and 0.977 and 0.093 for the tropical–subtropical oceans, respectively.

237 Following [Brewin et al. \(2015\)](#), the fractional contributions of PSCs to total Chl-a were then  
 238 calculated,

$$F_1 = \begin{cases} \frac{(-12.5C + 1)W_3P_3}{C_w} + \frac{\sum_{i=6}^7 W_i P_i}{C_w} & \text{if } C \leq 0.08 \text{ mg m}^{-3} \\ \frac{\sum_{i=6}^7 W_i P_i}{C_w} & \text{if } C > 0.08 \text{ mg m}^{-3} \end{cases}, \quad (2)$$

$$F_2 = \begin{cases} \frac{-12.5CW_3P_3}{C_w} + \frac{\sum_{i=4}^5 W_i P_i + W_1 P_{1,n}}{C_w} & \text{if } C \leq 0.08 \text{ mg m}^{-3} \\ \frac{\sum_{i=3}^5 W_i P_i + W_1 P_{1,n}}{C_w} & \text{if } C > 0.08 \text{ mg m}^{-3} \end{cases}, \quad (3)$$

240 and

$$F_3 = \frac{\sum_{i=1}^2 W_i P_i - W_1 P_{1,n}}{C_w}, \quad (4)$$

241 where  $F_1$ ,  $F_2$ , and  $F_3$  represent fractions of pico-, nano-, and microplankton, respectively. Since  
 242 fucoxanthin can be found in both micro- and nanoplankton, a portion of this pigment was  
 243 assigned to the nanoplankton group ([Devred et al., 2011](#)). This adjusted contribution,  $P_{1,n}$ ,  
 244 was computed using the expression  $P_{1,n} = 10^{q_1 \log_{10}(P_3) + q_2 \log_{10}(P_4)}$ , where  $P_3$  and  $P_4$  represent  
 245 19'-hexanoyloxyfucoxanthin and 19'-butanoyloxyfucoxanthin, with region-specific coefficients  $q_1$   
 246 and  $q_2$  derived through regression in  $\log_{10}$  space (see Table [S1](#)). When  $P_{1,n}$  exceeded  $P_1$ , it  
 247 was capped to  $P_1$ . The Chl-a specific to each size class, pico- ( $C_1$ ), nano- ( $C_2$ ), micro- ( $C_3$ ),  
 248 and combined pico- and nanoplankton ( $C_{1,2}$ ), were calculated by multiplying their respective  
 249 fractions (Equations 2–4) by the total in-situ Chl-a concentration ( $C$ ).

Table S1. Weighting coefficients for the seven diagnostic pigments and adjustment coefficients for fucoxanthin, used in this study for the Southern Ocean and the tropical–subtropical oceans. Values in brackets indicate the standard deviations associated with each weight and coefficient.

| Pigments                             | Weights      |                |                             |
|--------------------------------------|--------------|----------------|-----------------------------|
|                                      | $W$          | Southern Ocean | Tropical–subtropical oceans |
| Fucoxanthin ( $P_1$ )                | $W_1$        | 1.30 (0.01)    | 1.68 (0.02)                 |
| Peridinin ( $P_2$ )                  | $W_2$        | 0.91 (0.04)    | 0.87 (0.05)                 |
| 19'-Hexanoyloxyfucoxanthin ( $P_3$ ) | $W_3$        | 1.02 (0.01)    | 1.37 (0.01)                 |
| 19'-Butanoyloxyfucoxanthin ( $P_4$ ) | $W_4$        | 0.82 (0.03)    | 0.73 (0.03)                 |
| Alloxanthin ( $P_5$ )                | $W_5$        | 1.60 (0.02)    | 4.24 (0.13)                 |
| Total chlorophyll-b ( $P_6$ )        | $W_6$        | 1.31 (0.03)    | 0.74 (0.01)                 |
| Zeaxanthin ( $P_7$ )                 | $W_7$        | 1.30 (0.09)    | 1.07 (0.01)                 |
| Pigments                             | Coefficients |                |                             |
|                                      | $q$          | Southern Ocean | Tropical–subtropical oceans |
| 19'-Hexanoyloxyfucoxanthin ( $P_3$ ) | $q_1$        | 0.20 (0.03)    | 0.73 (0.04)                 |
| 19'-Butanoyloxyfucoxanthin ( $P_4$ ) | $q_2$        | 0.85 (0.02)    | 1.13 (0.03)                 |

## S4.2 Three-component model

Unlike previous approaches that fit the three-component model by estimating two components sequentially (i.e., fitting  $F_{1,2}$  and  $F_1$  in Equations 1 and 2 in the main text to retrieve  $C_{1,2}^m$ ,  $D_{1,2}$ ,  $C_1^m$ , and  $D_1$ ), this study employs a multivariable least-squares optimisation approach. This approach combines residuals from multiple components into a single objective function, with each residual weighted by the inverse of its standard deviation to account for measurement uncertainty. Owing to the interdependence of model variables (size fractions), the multivariable approach offers the advantage of accounting for these interactions, resulting in more consistent parameter estimates. To ensure robust parameter estimation, we evaluated different combinations of components, such as  $F_{1,2}$  with  $F_1$ ,  $F_{1,2}$  with  $F_2$ , and  $F_1$  with  $F_2$  and  $F_3$ . Across different combinations, parameter estimates and model performance were broadly consistent, with the pairing of  $F_{1,2}$  and  $F_2$  having the most accurate results.

Therefore, for the tropical–subtropical oceans, the three-component model was fitted using non-linear least-squares optimisation ('lmfit' in Python), based on in-situ  $C$ ,  $F_{1,2}$ , and  $F_2$ . The resulting parameter estimates and their 95% confidence intervals are presented in Table S2. The relationships between Chl-a and size fractions from this study are consistent with those in

previous studies (Figure S6), reflecting overlap in data distributions (Brewin et al., 2014b; Sun et al., 2023).

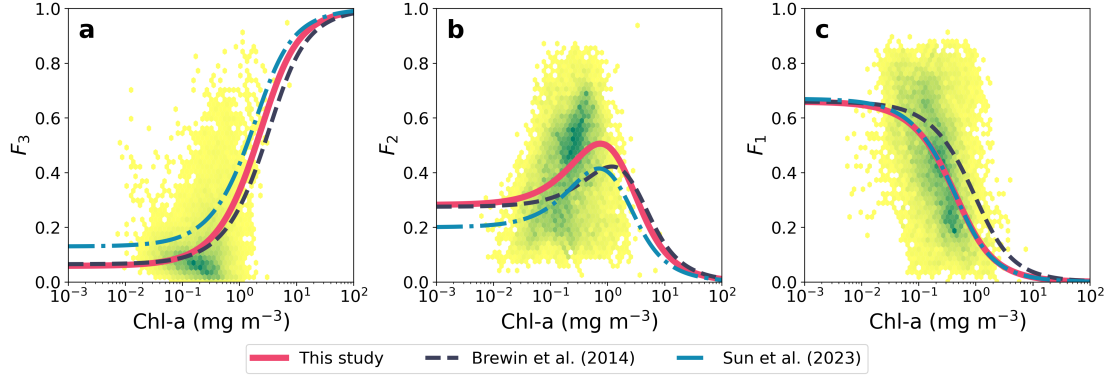

Figure S6. Fractional contributions of phytoplankton size classes, microplankton (a), nanoplankton (b), and picoplankton (c), as a function of total Chl-a in the tropical–subtropical ocean dataset. Background shading shows a density plot of the in-situ observations, with darker green indicating a higher number of data points. The re-tuned three-component model developed in this study is shown alongside model fits from previous studies (Brewin et al., 2014b; Sun et al., 2023) for comparison. The model parameters ( $C_{1,2}^m$ ,  $C_1^m$ ,  $D_{1,2}$ ,  $D_1$ ) are 1.785, 0.370, 0.935, 0.660 (see their Table ts01, Brewin et al., 2014b), and 0.95, 0.17, 0.87, 0.67 (see their Table 2, Sun et al., 2023), respectively.

In the Southern Ocean, the original exponential model struggled to capture the relationship between total Chl-a and PSCs. For example, microplankton contributions ( $F_3$ ) were highly variable across the full Chl-a range, with no clear exponential trend (Figure S7a). This contrasts with the tropical–subtropical regions, where  $F_3$  increases gradually at low Chl-a and more sharply beyond  $0.3 \text{ mg m}^{-3}$  (Figure S6a), a pattern well captured by the exponential model. However, in the Southern Ocean,  $F_3$  values spanned the full 0–1 range even at low Chl-a, making it difficult to fit a single exponential curve across the dataset. To address this issue, we developed a modified fitting approach tailored to the distributional characteristics of the Southern Ocean dataset. The dataset was divided into quantile-based bins for Chl-a and PSCs fractions, and the median values within each bin were computed to represent major tendencies. The exponential model was then fitted to these binned median values rather than the original data points. To evaluate the influence of bin resolution on the parameter result, we conducted a sensitivity analysis by varying the number of samples per bin (step size) from 1 to 30, which effectively adjusts the number of bins. We observed that as step size increased, the values of  $D_{1,2}$  and  $D_1$  for the Southern Ocean also increased, stabilising near one when the step size exceeds 14 (not shown). Based on this trend, we selected a step size of 13 for the Southern Ocean, which provided stable parameter estimates without over-smoothing the data. The model parameters are shown in Table S2. We also applied this binning-based method to the tropical–subtropical datasets. However, the parameter values, e.g.,  $D_{1,2}$ , were already stable across step sizes and closely aligned with the

287 results from the original (non-binned) method. Therefore, for the tropical–subtropical regions,  
 288 we retained the original fitting approach. The regional model of the Southern Ocean captures  
 289 the general trend observed in previous studies (Ward, 2015; Sun et al., 2023), particularly when  
 290 regional temperature information is incorporated, reflecting the cold environment of the region.  
 291 However, differences are observed in the relationship between  $F_3$  and Chl-a (Figure S7a), which  
 292 can be attributed to the different fitting methods used, with the modified version aligning more  
 293 closely with in-situ measurements.

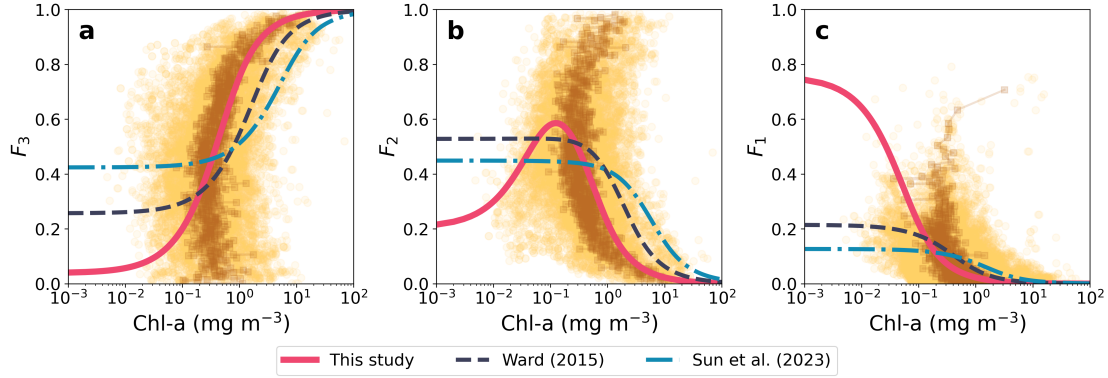

Figure S7. Fractional contributions of phytoplankton size classes, microplankton (a), nanoplankton (b), and picoplankton (c), as a function of total Chl-a in the Southern Ocean dataset (yellow circles), with quantile-binned median values shown as brown squares. The re-tuned three-component model developed in this study is shown alongside model fits from previous studies (Ward, 2015; Sun et al., 2023) for comparison. Note that model parameters here account for temperature (at 0 °C), using Equation 2 and Table 3 from Ward (2015) and Equations 8–11 and Table 2 from Sun et al. (2023), respectively.

Table S2. Parameter values of the three-component model for the Southern Ocean and tropical–subtropical regions. Values in brackets indicate the 5.55 and 94.45% confidence intervals, corresponding to two standard deviations.

| Region                      | $C_{1,2}^m$         | $C_1^m$             | $D_{1,2}$           | $D_1$               |
|-----------------------------|---------------------|---------------------|---------------------|---------------------|
| Southern Ocean              | 0.25<br>(0.24–0.27) | 0.02<br>(0.02–0.02) | 0.96<br>(0.90–1.00) | 0.76<br>(0.43–1.00) |
| Tropical–subtropical oceans | 1.28<br>(1.25–1.32) | 0.17<br>(0.17–0.18) | 0.94<br>(0.94–0.94) | 0.66<br>(0.65–0.67) |

## 294 References

295 Aiken, J., Pradhan, Y., Barlow, R., Lavender, S., Poulton, A., Holligan, P. and Hardman-  
 296 Mountford, N. (2009). Phytoplankton pigments and functional types in the Atlantic Ocean: A

297 decadal assessment, 1995-2005. *Deep Sea Research Part II: Topical Studies in Oceanography*  
 298 56: 899–917, doi:10.1016/j.dsr2.2008.09.017.

299 Bidigare, R. R. (2012). BiG RAPA water column HPLC pigments from R/V Melville MV1015  
 300 in the South Pacific from Arica, Chile to Easter Island. from November to December 2010  
 301 (C-MORE project). Biological and Chemical Oceanography Data Management Office (BCO-  
 302 DMO). Version Date 2012-11-05.

303 Boss, E. S., Collier, R., Larson, G., Fennel, K. and Pegau, W. S. (2007). Measurements of spectral  
 304 optical properties and their relation to biogeochemical variables and processes in Crater Lake,  
 305 Crater Lake National Park, OR. *Hydrobiologia* 574: 149–159, doi:10.1007/s10750-006-2609-3.

306 Bracher, A. (2014). Phytoplankton pigments measured on water bottle samples during SONNE  
 307 cruise SO218. Alfred Wegener Institute, Helmholtz Centre for Polar and Marine Research,  
 308 Bremerhaven. doi:10.1594/PANGAEA.848589.

309 Bracher, A. (2015a). Phytoplankton pigment concentrations during Maria S. Merian cruise  
 310 MSM18/3. Alfred Wegener Institute, Helmholtz Centre for Polar and Marine Research, Bre-  
 311 merhaven. doi:10.1594/PANGAEA.848586.

312 Bracher, A. (2015b). Phytoplankton pigment concentrations during POLARSTERN cruise ANT-  
 313 XXIV/1. Alfred Wegener Institute, Helmholtz Centre for Polar and Marine Research, Bremer-  
 314 haven. doi:10.1594/PANGAEA.848583.

315 Bracher, A. (2015c). Phytoplankton pigment concentrations during POLARSTERN cruise ANT-  
 316 XXIV/4. Alfred Wegener Institute, Helmholtz Centre for Polar and Marine Research, Bremer-  
 317 haven. doi:10.1594/PANGAEA.848584.

318 Bracher, A. (2015d). Phytoplankton pigment concentrations during POLARSTERN cruise ANT-  
 319 XXVI/4. Alfred Wegener Institute, Helmholtz Centre for Polar and Marine Research, Bremer-  
 320 haven. doi:10.1594/PANGAEA.848585.

321 Bracher, A. (2015e). Phytoplankton pigment concentrations during POLARSTERN cruise ANT-  
 322 XXVII/2. Alfred Wegener Institute, Helmholtz Centre for Polar and Marine Research, Bre-  
 323 merhaven. doi:10.1594/PANGAEA.848590.

324 Bracher, A. (2017a). Remote sensing reflectance during POLARSTERN cruise ANT-XXV/1.  
 325 doi:https://doi.org/10.1594/PANGAEA.879225.

326 Bracher, A. (2017b). Remote sensing reflectance during POLARSTERN cruise ANT-XXVI/4.  
 327 doi:https://doi.org/10.1594/PANGAEA.879226.

328 Bracher, A. (2019). Phytoplankton pigment concentrations in the Southern Ocean during RV  
 329 POLARSTERN cruise PS103 in Dec 2016 to Jan 2017. Alfred Wegener Institute, Helmholtz  
 330 Centre for Polar and Marine Research, Bremerhaven. doi:10.1594/PANGAEA.898941.

331 Bracher, A. and Cheah, W. (2022). Remote sensing reflectance measured in the South China  
 332 Sea and Sulu Sea during RV Sonne cruise SO218 from 18 to 27 November 2011. doi:https:  
 333 //doi.org/10.1594/PANGAEA.946368.

334 Bracher, A., Taylor, M. H., Taylor, B. B., Dinter, T., Röttgers, R. and Steinmetz, F. (2015).  
 335 Phytoplankton pigment concentrations during POLARSTERN cruise ANT-XXIII/1. doi:10.  
 336 1594/PANGAEA.871713.

337 Bracher, A., Wiegmann, S., Xi, H. and Dinter, T. (2020). Phytoplankton pigment concentration  
 338 and phytoplankton groups measured on water samples obtained during POLARSTERN cruise  
 339 PS113 in the Atlantic Ocean. doi:10.1594/PANGAEA.911061.

340 Brewin, R. J. W., Ciavatta, S., Sathyendranath, S., Jackson, T., Tilstone, G., Curran, K., Airs,  
 341 R. L., Cummings, D., Brotas, V., Organelli, E., Dall’Olmo, G. and Raitsos, D. E. (2017).  
 342 Uncertainty in Ocean-Color Estimates of Chlorophyll for Phytoplankton Groups. *Frontiers in*  
 343 *Marine Science* 4, doi:https://doi.org/10.3389/fmars.2017.00104.

344 Brewin, R. J. W., Dall’Olmo, G., Pardo, S., Dongen-Vogels, V. van and Boss, E. S. (2016).  
 345 Underway spectrophotometry along the Atlantic Meridional Transect reveals high performance  
 346 in satellite chlorophyll retrievals. *Remote Sensing of Environment* 183: 82–97, doi:10.1016/j.  
 347 rse.2016.05.005.

348 Brewin, R. J. W., Dall’Olmo, G., Sathyendranath, S. and Hardman-Mountford, N. J. (2012).  
 349 Particle backscattering as a function of chlorophyll and phytoplankton size structure in the  
 350 open-ocean. *Optics Express* 20: 17632, doi:10.1364/OE.20.017632.

351 Brewin, R. J. W., Morán, X. A. G., Raitsos, D. E., Gittings, J. A., Calleja, M. L., Viegas, M.,  
 352 Ansari, M. I., Al-Otaibi, N., Huete-Stauffer, T. M. and Hoteit, I. (2019). Factors Regulating  
 353 the Relationship Between Total and Size-Fractionated Chlorophyll-a in Coastal Waters of the  
 354 Red Sea. *Frontiers in Microbiology* 10, doi:https://doi.org/10.3389/fmicb.2019.01964.

355 Brewin, R. J. W., Pitarch, J., Dall’Olmo, G., Woerd, H. J. van der, Lin, J., Sun, X. and  
 356 Tilstone, G. H. (2023). Evaluating historic and modern optical techniques for monitoring  
 357 phytoplankton biomass in the Atlantic Ocean. *Frontiers in Marine Science* 10, doi:10.3389/  
 358 fmars.2023.1111416.

359 Brewin, R. J. W., Sathyendranath, S., Hirata, T., Lavender, S. J., Barciela, R. M. and Hardman-  
360 Mountford, N. J. (2010). A three-component model of phytoplankton size class for the Atlantic  
361 Ocean. *Ecological Modelling* 221: 1472–1483, doi:10.1016/j.ecolmodel.2010.02.014.

362 Brewin, R. J. W., Sathyendranath, S., Jackson, T., Barlow, R., Brotas, V., Aires, R. and Lamont,  
363 T. (2015). Influence of light in the mixed-layer on the parameters of a three-component model  
364 of phytoplankton size class. *Remote Sensing of Environment* 168: 437–450, doi:10.1016/j.rse.  
365 2015.07.004.

366 Brewin, R. J. W., Sathyendranath, S., Lange, P. K. and Tilstone, G. (2014a). Comparison of  
367 two methods to derive the size-structure of natural populations of phytoplankton. *Deep Sea*  
368 *Research Part I: Oceanographic Research Papers* 85: 72–79, doi:https://doi.org/10.1016/j.ds  
369 r.2013.11.007.

370 Brewin, R. J. W., Sathyendranath, S., Tilstone, G., Lange, P. K. and Platt, T. (2014b). A mul-  
371 ticomponent model of phytoplankton size structure. *Journal of Geophysical Research: Oceans*  
372 119: 3478–3496, doi:10.1002/2014JC009859.

373 Bricaud, A., Babin, M., Morel, A. and Claustre, H. (1995). Variability in the chlorophyll-specific  
374 absorption coefficients of natural phytoplankton: Analysis and parameterization. *Journal of*  
375 *Geophysical Research: Oceans* 100: 13321–13332, doi:10.1029/95JC00463.

376 British Oceanographic Data Centre (BODC) (2020). A nutrient and carbon pump over mid-  
377 ocean ridges (RidgeMix). [https://www.bodc.ac.uk/resources/inventories/cruise\\_inve](https://www.bodc.ac.uk/resources/inventories/cruise_inventory/report/16043/)  
378 [ntory/report/16043/](https://www.bodc.ac.uk/resources/inventories/cruise_inventory/report/16043/), accessed: 2025-06-26.

379 California Current Ecosystem LTER and Goericke, R. (2018). Size fractionation for total Chl  
380 a within the surface layer and calculated size distribution of total Chl a from discrete bottle  
381 samples from CCE-CalCOFI Augmented Cruises in the California Current System, 2004 -  
382 2017 (ongoing). doi:10.6073/pasta/8ebed2a2ac22a27b23e7ba98f10dcbb4.

383 Claustre, H. (2013). Pigment concentrations in surface water during THALASSA campaign  
384 PROSOPE. doi:10.1594/PANGAEA.805388.

385 Claustre, H., Hooker, S. B., Heukelem, L. V., Berthon, J.-F., Barlow, R., Ras, J., Sessions, H.,  
386 Targa, C., Thomas, C. S., Linde, D. van der and Marty, J.-C. (2004). An intercomparison of  
387 HPLC phytoplankton pigment methods using in situ samples: application to remote sensing  
388 and database activities. *Marine Chemistry* 85: 41–61, doi:10.1016/j.marchem.2003.09.002.

389 Clayton, S., Nagai, T. and Follows, M. J. (2014). (Supplement 1) Hydrochemistry and phyto-  
390 plankton pigments in water samples obtained during R/V Natsushima (JAMSTEC) cruise to  
391 the Kuroshio Extension Front in October 2009. doi:10.1594/PANGAEA.819108.

392 Clementson, L. A. and Wojtasiewicz, B. (2019). Dataset on the absorption characteristics of  
393 extracted phytoplankton pigments. *Data in Brief* 24: 103875, doi:10.1016/j.dib.2019.103875.

394 Dall’Olmo, G., Westberry, T. K., Behrenfeld, M. J., Boss, E. and Slade, W. H. (2009). Significant  
395 contribution of large particles to optical backscattering in the open ocean. *Biogeosciences* 6:  
396 947–967, doi:10.5194/bg-6-947-2009.

397 Devred, E., Sathyendranath, S., Stuart, V. and Platt, T. (2011). A three component classification  
398 of phytoplankton absorption spectra: Application to ocean-color data. *Remote Sensing of*  
399 *Environment* 115: 2255–2266, doi:10.1016/j.rse.2011.04.025.

400 DiTullio, G. (2011). HPLC analyses of algal pigment concentrations from the CoFeMUG cruise  
401 (KN192-05) in the South Atlantic subtropical gyre during 2007. Biological and Chemical  
402 Oceanography Data Management Office (BCO-DMO). Version Date 2011-05-18.

403 DiTullio, G. (2015). Sample HPLC pigments from RVIB Nathaniel B. Palmer NBP1302 cruise in  
404 the Ross Sea during 2013 (TRACERS project). Biological and Chemical Oceanography Data  
405 Management Office (BCO-DMO). Version Date 2015-05-18.

406 Ferreira, A., Brito, A. C., Mendes, C. R. B., Brotas, V., Costa, R. R., Guerreiro, C. V., Sá, C. and  
407 Jackson, T. (2022). OC4-SO: A New Chlorophyll-a Algorithm for the Western Antarctic Penin-  
408 sula Using Multi-Sensor Satellite Data. *Remote Sensing* 14: 1052, doi:10.3390/rs14051052.

409 Hayward, A., Pinkerton, M. H., Wright, S. W., Gutiérrez-Rodríguez, A. and Law, C. S. (2024).  
410 Twenty-six years of phytoplankton pigments reveal a circumpolar Class Divide around the  
411 Southern Ocean. *Communications Earth & Environment* 5, doi:10.1038/s43247-024-01261-6.

412 Hepach, H., Quack, B., Tegtmeier, S., Engel, A., Bracher, A., Fuhlbrügge, S., Galgani, L., Atlas,  
413 E. L., Lampel, J., Frieß, U. and Krüger, K. (2016). Pigment measured on water bottle samples  
414 during METEOR cruise M91. doi:10.1594/PANGAEA.864786.

415 Hirata, T., Hardman-Mountford, N. J., Brewin, R. J. W., Aiken, J., Barlow, R., Suzuki, K.,  
416 Isada, T., Howell, E., Hashioka, T., Noguchi-Aita, M. and Yamanaka, Y. (2011). Synoptic  
417 relationships between surface Chlorophyll-a and diagnostic pigments specific to phytoplankton  
418 functional types. *Biogeosciences* 8: 311–327, doi:10.5194/bg-8-311-2011.

419 IMOS (2021a). IMOS - SRS - Ocean Colour - Bio Optical Database of Australian Waters.



IMOS (2021b). IMOS National Reference Station (NRS) - Phytoplankton HPLC Pigment Composition Analysis.

Jackson, T., Sathyendranath, S. and Mélin, F. (2017). An improved optical classification scheme for the Ocean Colour Essential Climate Variable and its applications. *Remote Sensing of Environment* 203: 152–161, doi:10.1016/j.rse.2017.03.036.

Johnson, R., Strutton, P. G., Wright, S. W., McMinn, A. and Meiners, K. M. (2013). Three improved satellite chlorophyll algorithms for the Southern Ocean. *Journal of Geophysical Research: Oceans* 118: 3694–3703, doi:10.1002/jgrc.20270.

Jordan, T. M., Dall’Olmo, G., Tilstone, G., Brewin, R. J. W., Nencioli, F., Airs, R., Thomas, C. S. and Schlüter, L. (2024). A compilation of surface inherent optical properties and phytoplankton pigment concentrations from the Atlantic Meridional Transect. *Earth System Science Data* 17: 493–516, doi:10.5194/essd-17-493-2025.

Kramer, S. J., Siegel, D. A., Maritorena, S. and Catlett, D. (2021). Global surface ocean HPLC phytoplankton pigments and hyperspectral remote sensing reflectance. doi:https://doi.org/10.1594/PANGAEA.937536.

Landry, M. R. (2021). Phytoplankton HPLC pigment concentrations from samples collected in the Gulf of Mexico on R/V Nancy Foster cruises in May 2017 and May 2018. Biological and Chemical Oceanography Data Management Office (BCO-DMO) (Version 1) Version Date 2021-05-03. doi:10.26008/1912/bco-dmo.851250.1.

Lee, P. (2020). HPLC pigment data from samples collected during R/V Savannah cruises conducted in the South Atlantic Bight off the coast of Georgia from 2015-2017. Biological and Chemical Oceanography Data Management Office (BCO-DMO). (Version 1) Version Date 2020-06-19. doi:10.26008/1912/bco-dmo.816216.1.

Lee, Z., Hu, C., Shang, S., Du, K., Lewis, M., Arnone, R. and Brewin, R. (2013). Penetration of UV-visible solar radiation in the global oceans: Insights from ocean color remote sensing. *Journal of Geophysical Research: Oceans* 118: 4241–4255, doi:10.1002/jgrc.20308.

Lin, J., Dall’Olmo, G., Tilstone, G. H., Brewin, R. J. W., Vabson, V., Ansko, I., Evers-King, H., Casal, T. and Donlon, C. (2022). Derivation of uncertainty budgets for continuous above-water radiometric measurements along an Atlantic Meridional Transect. *Optics Express* 30: 45648, doi:10.1364/OE.470994.

Lohrenz, S., Chakraborty, S. and Cai, W.-J. (2020). High pressure liquid chromatography analyses of photosynthetic pigments taken on the R/V Acadian and R/V Pelican from September

to October 2017 in the Central northern Gulf of Mexico. Biological and Chemical Oceanog-  
raphy Data Management Office (BCO-DMO). (Version 1) Version Date 2020-02-03. doi:  
10.1575/1912/bco-dmo.789061.1.

McGillicuddy, D. (2007a). HPLC pigments, EDDIES WB cruises from R/V Weatherbird II  
WB0409, WB0413, WB0506, WB0508 in the Sargasso Sea from 2004-2005 (EDDIES project).  
Biological and Chemical Oceanography Data Management Office (BCO-DMO). (Version 1)  
Version Date 2007-03-13. doi:10.1575/1912/bco-dmo.3023.1.

McGillicuddy, D. (2007b). Pigments from HPLC analysis of bottle samples collected during R/V  
Oceanus cruises OC404-01, OC404-04, OC415-01 and OC415-03 from the Sargasso Sea, June  
11, 2004 to August 24, 2005 (EDDIES project). Biological and Chemical Oceanography Data  
Management Office (BCO-DMO). Version Date 2007-11-01. doi:10.1575/1912/5075.

Mobley, C. D. (1999). Estimation of the remote-sensing reflectance from above-surface measure-  
ments. *Applied Optics* 38: 7442, doi:10.1364/AO.38.007442.

Mueller, J. L., Morel, A., Frouin, R., Davis, C., Arnone, R., Carder, K., Lee, Z. P., Steward,  
R. G., Hooker, S., Mobley, C. D., McLean, S., Holben, B., Miller, M., Pietras, C., Knobel-  
spiesse, K. D., Fargion, G. S., Porter, J. and Voss, K. (2003). *Ocean Optics Protocols For  
Satellite Ocean Color Sensor Validation, Revision 4, Volume III: Radiometric Measurements  
and Data Analysis Protocols*. National Aeronautical and Space administration.

O'Reilly, J. E. and Werdell, P. J. (2019). Chlorophyll algorithms for ocean color sensors - OC4,  
OC5 & OC6. *Remote Sensing of Environment* 229: 32–47, doi:10.1016/j.rse.2019.04.021.

Palmer Station Antarctica LERT, Schofield, O., Vernet, M. and Prezelin, B. (2018). Photo-  
synthetic pigments of water column samples and analyzed with High Performance Liquid  
Chromatography (HPLC), collected aboard Palmer LTER annual cruises off the coast of the  
Western Antarctica Peninsula, 1991 - 2016. doi:10.6073/pasta/4d583713667a0f52b9d2937a26d  
0d82e.

Palmer Station Antarctica LTER, Schofield, O., Vernet, M. and Prezelin, B. (2020). Photosyn-  
thetic pigments of water column samples analyzed using High Performance Liquid Chromatog-  
raphy (HPLC), sampled during the Palmer LTER field seasons at Palmer Station, Antarctica,  
1991 – 2015. doi:10.6073/PASTA/EC55E3D0D7260E1DF98C9156F9BECDEB.

Pardo, S., Tilstone, G. H., Brewin, R. J. W., Dall’Olmo, G., Lin, J., Nencioli, F., Evers-King,  
H., Casal, T. G. D. and Donlon, C. J. (2023). Radiometric assessment of OLCI, VIIRS, and  
MODIS using fiducial reference measurements along the Atlantic Meridional Transect. *Remote  
Sensing of Environment* 299: 113844, doi:10.1016/j.rse.2023.113844.

485 Peeken, I., Bluhm, K. and Zöllner, E. (2017a). Phytoplankton pigments measured from underway  
486 and water bottle samples during Marion Dufresne cruise MD158 (OOMPH MD07 leg 1). doi:  
487 10.1594/PANGAEA.873203.

488 Peeken, I., Bluhm, K. and Zöllner, E. (2017b). Phytoplankton pigments measured from underway  
489 and water bottle samples during Marion Dufresne cruise MD160 (OOMPH MD07 leg 2). doi:  
490 10.1594/PANGAEA.873208.

491 Peeken, I., Bracher, A. and Murawski, S. (2017c). Phytoplankton pigments measured on water  
492 bottle samples during POLARSTERN cruise ANT-XXIV/2. doi:10.1594/PANGAEA.873199.

493 Peeken, I. and Hoffmann, L. (2014). Phytoplankton pigments and nutrients measured on water  
494 bottle samples during METEOR cruise M55. doi:10.1594/PANGAEA.869828.

495 Peeken, I. and Nachtigall, K. (2014). Pigments measured on water bottle samples during ME-  
496 TEOR cruise M60. doi:10.1594/PANGAEA.869830.

497 Peeken, I. and Quack, B. (2017). Phytoplankton pigments measured on underway and water  
498 bottle samples during POSEIDON cruise POS320. doi:10.1594/PANGAEA.873198.

499 Peeken, I. and Walter, S. (2017). Phytoplankton pigments measured from underway and water  
500 bottle samples during POSEIDON cruise POS348. doi:10.1594/PANGAEA.873200.

501 Peeken, I., Wilken, S., Bremer, K. and Schnack-Schiel, S. B. (2017d). Phytoplankton pigments  
502 measured from seawater samples from the Spermonde Archipelago in southwest Sulawesi,  
503 Indonesia. doi:10.1594/PANGAEA.873209.

504 Richardson, T., Condon, R. and Neuer, S. (2013). Pigment concentrations (HPLC) from R/V  
505 Atlantic Explorer cruises AE1102, AE1118, AE1206, AE1219 in the Sargasso Sea, Bermuda  
506 Atlantic Time-Series Station (BATS) from 2011-2012 (Trophic BATS project). Biological and  
507 Chemical Oceanography Data Management Office (BCO-DMO). (Version 1) Version Date  
508 2013-06-14. doi:10.1575/1912/bco-dmo.3884.1.

509 Sathyendranath, S., Jackson, T., Brockmann, C., Brotas, V., Calton, B., Chuprin, A.,  
510 Clements, O., Cipollini, P., Danne, O., Dingle, J., Donlon, C., Grant, M., Groom, S.,  
511 Krasemann, H., Lavender, S., Mazeran, C., Mélin, F., Müller, D., Steinmetz, F., Valente,  
512 A., Zühlke, M., Feldman, G., Franz, B., Frouin, R., Werdell, J. and Platt, T. (2021).  
513 ESA Ocean Colour Climate Change Initiative (Ocean.Colour.cci): Version 5.0 Data. doi:  
514 10.5285/1dbe7a109c0244aaad713e078fd3059a.

515 Slade, W. H., Boss, E., Dall’Olmo, G., Langner, M. R., Loftin, J., Behrenfeld, M. J., Roesler,  
516 C. and Westberry, T. K. (2010). Underway and Moored Methods for Improving Accuracy in

517 Measurement of Spectral Particulate Absorption and Attenuation. *Journal of Atmospheric*  
518 *and Oceanic Technology* 27: 1733–1746, doi:10.1175/2010JTECHO755.1.

519 Sosik, H. M., Rynearson, T., Menden-Deuer, S. and OOI CGSN Data Team (2021). Size-  
520 fractionated chlorophyll from water column bottle samples collected during NES-LTER Tran-  
521 sect cruises, ongoing since 2017. doi:10.6073/pasta/798bda0e9ddfeba20f2266e64cf4dd40.

522 Southern California Bight MBON, Santa Barbara Coastal LTER, Catlett, D., Siegel, D. and Guil-  
523 locheau, N. (2021). Plumes and Blooms: Curated oceanographic and phytoplankton pigment  
524 observations ver 2. Environmental Data Initiative. doi:10.6073/PASTA/12BD9B9805396ECE  
525 F006549144508124.

526 Sun, X., Brewin, R. J. W., Sathyendranath, S., Dall’Olmo, G., Airs, R., Barlow, R., Bracher,  
527 A., Brotas, V., Kheireddine, M., Lamont, T., Marañón, E., Morán, X. A. G., Raitsos, D. E.,  
528 Shen, F. and Tilstone, G. H. (2023). Coupling ecological concepts with an ocean-colour model:  
529 Phytoplankton size structure. *Remote Sensing of Environment* 285: 113415, doi:10.1016/j.rs  
530 e.2022.113415.

531 Sun, X., Brewin, R. J. W., Sathyendranath, S., Dall’Olmo, G., Antoine, D., Barlow, R., Bracher,  
532 A., Kheireddine, M., Li, M., Raitsos, D. E., Shen, F., Tilstone, G. H. and Vellucci, V. (2025).  
533 Coupling ecological concepts with an ocean-colour model: Parameterisation and forward mod-  
534 elling. *Remote Sensing of Environment* 316: 114487, doi:https://doi.org/10.1016/j.rse.2024.  
535 114487.

536 Taylor, B. B. and Bracher, A. (2017). Pigment concentrations measured in surface water during  
537 SONNE cruise SO202/2 (TRANSBROM). doi:10.1594/PANGAEA.880235.

538 Taylor, B. B., Torrecilla, E., Bernhardt, A., Taylor, M. H., Peeken, I., Röttgers, R., Piera, J.  
539 and Bracher, A. (2011a). Phytoplankton pigments, composition, hyperspectral light field data  
540 and biooptical properties during POLARSTERN cruise ANT-XXV/1. doi:https://doi.org/10.  
541 1594/PANGAEA.819099.

542 Taylor, B. B., Torrecilla, E., Bernhardt, A., Taylor, M. H., Peeken, I., Röttgers, R., Piera, J. and  
543 Bracher, A. (2011b). Pigments of phytoplankton during POLARSTERN cruise ANT-XXV/1.  
544 doi:10.1594/PANGAEA.819070.

545 Uitz, J., Claustre, H., Morel, A. and Hooker, S. B. (2006). Vertical distribution of phytoplankton  
546 communities in open ocean: An assessment based on surface chlorophyll. *Journal of Geophys-*  
547 *ical Research* 111, doi:10.1029/2005JC003207.

548 Vaillancourt, R. D. and Marra, J. F. (2011). Chlorophyll derived from HPLC from R/V Atlantic  
549 Explorer and R/V Cape Hatteras multiple cruises in the Sargasso Sea, Bermuda Atlantic  
550 Time Series (BATS) area, and Hydrostation "S" from 2007 to 2008 (ON DEQUE project).  
551 Biological and Chemical Oceanography Data Management Office (BCO-DMO). Version Date  
552 2011-09-09.

553 Valente, A., Sathyendranath, S., Brotas, V., Groom, S., Grant, M., Jackson, T., Chuprin, A.,  
554 Taberner, M., Airs, R., Antoine, D., Arnone, R., Balch, W. M., Barker, K., Barlow, R.,  
555 Bélanger, S., Berthon, J.-F., Beşiktepe, Ş., Borsheim, Y., Bracher, A., Brando, V., Brewin,  
556 R. J. W., Canuti, E., Chavez, F. P., Cianca, A., Claustre, H., Clementson, L., Crout, R.,  
557 Ferreira, A., Freeman, S., Frouin, R., García-Soto, C., Gibb, S. W., Goericke, R., Gould,  
558 R., Guillocheau, N., Hooker, S. B., Hu, C., Kahru, M., Kampel, M., Klein, H., Kratzer,  
559 S., Kudela, R., Ledesma, J., Lohrenz, S., Loisel, H., Mannino, A., Martinez-Vicente, V.,  
560 Matrai, P., McKee, D., Mitchell, B. G., Moisan, T., Montes, E., Muller-Karger, F., Neeley,  
561 A., Novak, M., O'Dowd, L., Ondrusek, M., Platt, T., Poulton, A. J., Repecaud, M., Röttgers,  
562 R., Schroeder, T., Smyth, T., Smythe-Wright, D., Sosik, H. M., Thomas, C., Thomas, R.,  
563 Tilstone, G., Tracana, A., Twardowski, M., Vellucci, V., Voss, K., Werdell, J., Wernand, M.,  
564 Wojtasiewicz, B., Wright, S. and Zibordi, G. (2022). A compilation of global bio-optical in  
565 situ data for ocean colour satellite applications – version three. *Earth System Science Data*  
566 14: 5737–5770, doi:10.5194/essd-14-5737-2022.

567 Venables, H., Meredith, M. P., Hendry, K. R., Hoopen, P. ten, Peat, H., Chapman, A., Beaumont,  
568 J., Piper, R., Miller, A. J., Mann, P., Rossetti, H., Massey, A., Souster, T., Reeves, S.,  
569 Fenton, M., Heiser, S., Pountney, S., Reed, S., Waring, Z., Clark, M., Bolton, E., Mathews,  
570 R., London, H., Clement, A., Stuart, E., Reichardt, A., Brandon, M., Leng, M., Arrowsmith,  
571 C., Annett, A., Henley, S. F. and Clarke, A. (2023). Sustained year-round oceanographic  
572 measurements from Rothera Research Station, Antarctica, 1997–2017. *Scientific Data* 10, doi:  
573 10.1038/s41597-023-02172-5.

574 Vidussi, F., Claustre, H., Manca, B. B., Luchetta, A. and Marty, J.-C. (2001). Phytoplankton  
575 pigment distribution in relation to upper thermocline circulation in the eastern Mediterranean  
576 Sea during winter. *Journal of Geophysical Research: Oceans* 106: 19939–19956, doi:10.1029/  
577 1999JC000308.

578 Ward, B. A. (2015). Temperature-Related Changes in Phytoplankton Community Structure  
579 Are Restricted to Polar Waters. *PLOS ONE* 10: e0135581, doi:10.1371/journal.pone.0135581.

580 Wei, J., Lee, Z. and Shang, S. (2016). A system to measure the data quality of spectral remote

581 sensing reflectance of aquatic environments. *Journal of Geophysical Research: Oceans* doi:  
582 10.1002/2016JC012126.

583 Werdell, P. J. and Bailey, S. W. (2005). An improved in-situ bio-optical data set for ocean color  
584 algorithm development and satellite data product validation. *Remote Sensing of Environment*  
585 98: 122–140, doi:10.1016/j.rse.2005.07.001.

586 Werdell, P. J., Bailey, S. W., Fargion, G. S., Pietras, C., Knobelspiesse, K. D., Feldman, G. C.  
587 and McClain, C. R. (2003). Unique data repository facilitates ocean color satellite validation.  
588 *EOS Trans. AGU* 84: 377.

589 Xi, H., Losa, S. N., Mangin, A., Garnesson, P., Bretagnon, M., Demaria, J., Soppa, M. A.,  
590 Hembise Fanton d’Andon, O. and Bracher, A. (2021). A data set of collocated satellite re-  
591 mote sensing reflectance from GlobColour merged products, chlorophyll a concentration of  
592 phytoplankton functional types derived from in situ pigment data, and CMEMS sea surface  
593 temperature from 2002 to 2012. doi:<https://doi.pangaea.de/10.1594/PANGAEA.930087>.

594 Xi, H., Peeken, I., Gomes, M., Brotas, V., Tilstone, G. H., Brewin, R. J. W., Dall’Olmo,  
595 G., Tracana, A., Alvarado, L. M. A., Murawski, S., Wiegmann, S. and Bracher, A. (2023).  
596 Phytoplankton pigment concentrations and phytoplankton groups measured on water samples  
597 collected from various expeditions in the Atlantic Ocean from 71°S to 84°N. doi:10.1594/PA  
598 NGAEA.954738.
